# Supplementary material for: The POLD1R689W variant increases the sensitivity of colorectal cancer cells to ATR and CHK1 inhibitors
Source: PubMed Central journal article supplement (PMC7641191; doi:10.1038/s41598-020-76033-1), 2020-11-03
Supplement: 41598_2020_76033_MOESM1_ESM.pdf [file 41598_2020_76033_MOESM1_ESM.pdf]

# The *POLD1*<sup>R689W</sup> variant increases the sensitivity of colorectal cancer cells to ATR and CHK1 inhibitors

Albert Job<sup>1</sup>, Marina Tatura<sup>1</sup>, Cora Schäfer<sup>1</sup>, Veronika Lutz<sup>1</sup>, Hanna Schneider<sup>1</sup>, Brigitte Lankat-Buttgereit<sup>1</sup>, Alexandra Zielinski<sup>2</sup>, Kerstin Borgmann<sup>2</sup>, Christian Bauer<sup>1</sup>, Thomas M. Gress<sup>1</sup>, Malte Buchholz<sup>1</sup>, and Eike Gallmeier<sup>1,\*</sup>

<sup>1</sup>Department of Gastroenterology, Endocrinology, Metabolism, and Infectiology, University Hospital of Marburg, Philipps-University Marburg, Marburg, Germany

<sup>2</sup>Lab of Radiobiology & Experimental Radiooncology, University Medical Center Hamburg-Eppendorf, Hamburg, Germany

\*eike.gallmeier@med.uni-marburg.de

## Supplementary Information

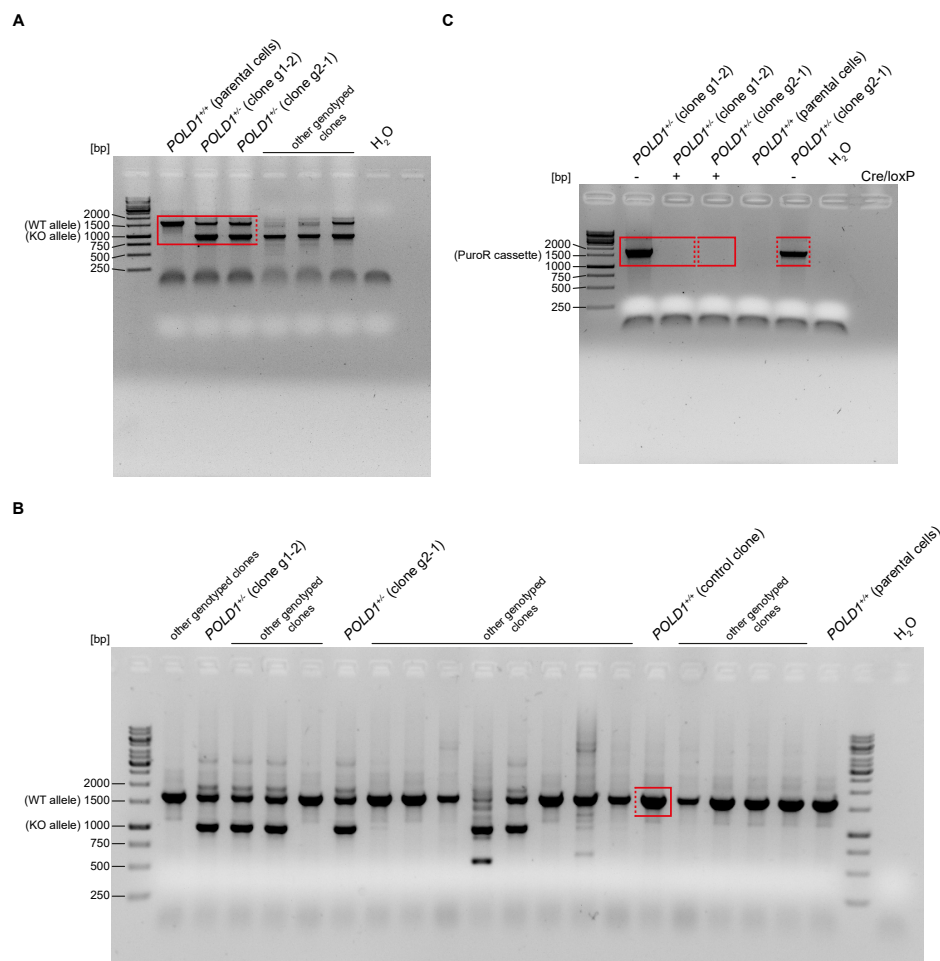

**Figure S1.** (A+B) Original gels of the PCR detecting the *POLD1*-KO and -WT alleles in the *POLD1*<sup>+/+</sup> parental and control clones as well as in the *POLD1*<sup>+/+</sup> clones g1-2 and g2-1. Data which were cropped and depicted in Figure 1B are framed red. (C) Original gels of the PCR detecting the Cre/loxP-mediated excision of the puromycin resistance cassette. Data which were cropped and depicted in Figure 1C are framed red.

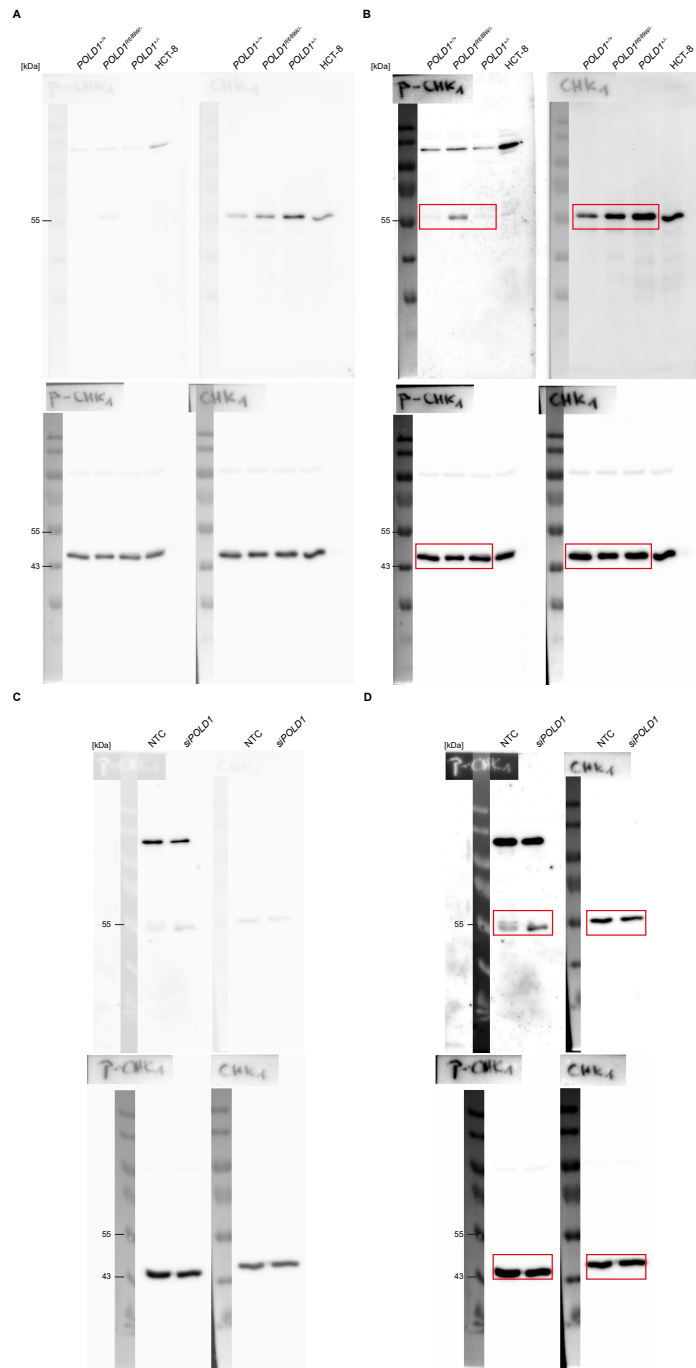

**Figure S2.** (A, upper panel) Original immunoblots and (B, upper panel) immunoblots after contrast modification of constitutive protein levels of pCHK1 and CHK1 in *POLD1*<sup>+/+</sup>, *POLD1*<sup>R689W/+</sup> and *POLD1*<sup>+/-</sup> cells. (A+B, lower panels) Original immunoblots and immunoblots after contrast modification, respectively, of β-Actin serving as loading control. (C, upper panel) Original immunoblots and (D, upper panel) immunoblots after contrast modification of protein levels of pCHK1 and CHK1 120 hours after *siPOLD1* transfection in *POLD1*<sup>+/+</sup> cells. (C+D, lower panels) Original immunoblots and immunoblots after contrast modification, respectively, of β-Actin serving as loading control. Data which were cropped and depicted in Figure 3A are framed red.

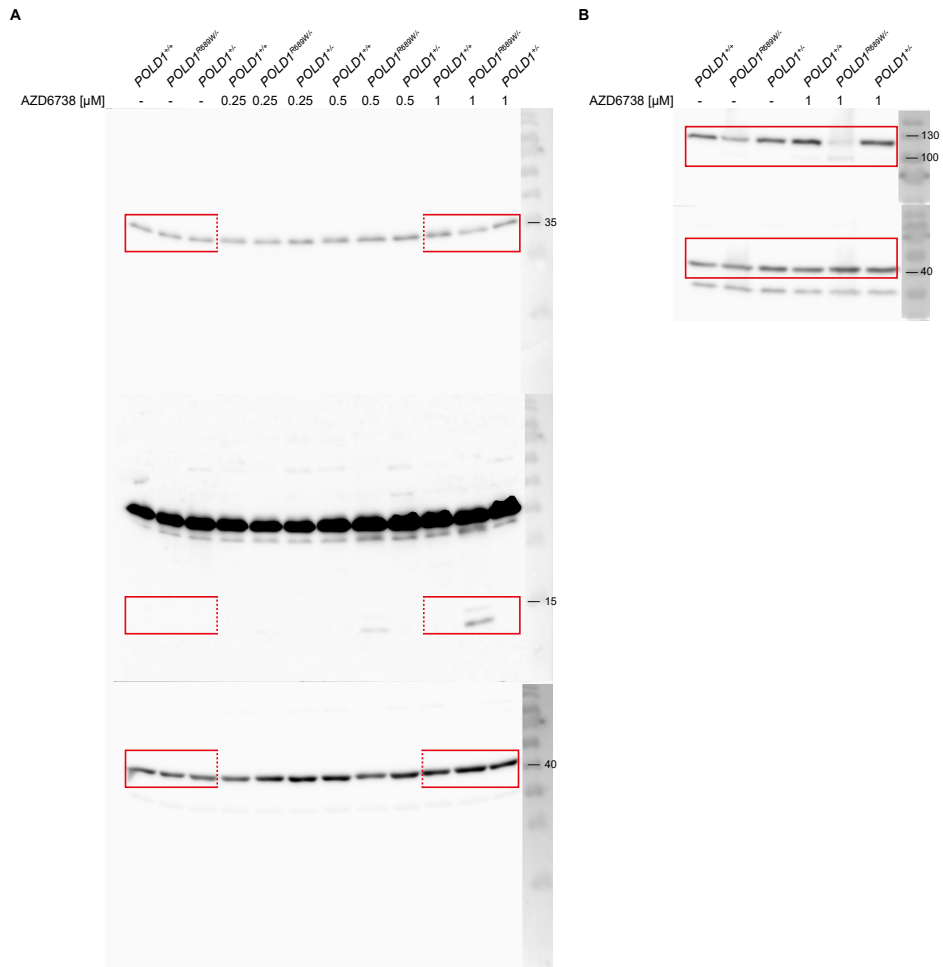

**Figure S3.** Original immunoblots of protein levels of (A, upper part) caspase 3, (A, middle part) cleaved caspase 3 as well as (B, upper part) PARP and cleaved PARP in *POLD1*<sup>+/+</sup>, *POLD1*<sup>R689W/+</sup> and *POLD1*<sup>+/+</sup> cells 72 hours after treatment with AZD6738. (A+B, lower parts) Original immunoblots of β-Actin serving as loading control. Data which were cropped and depicted in Figure 4C are framed red.

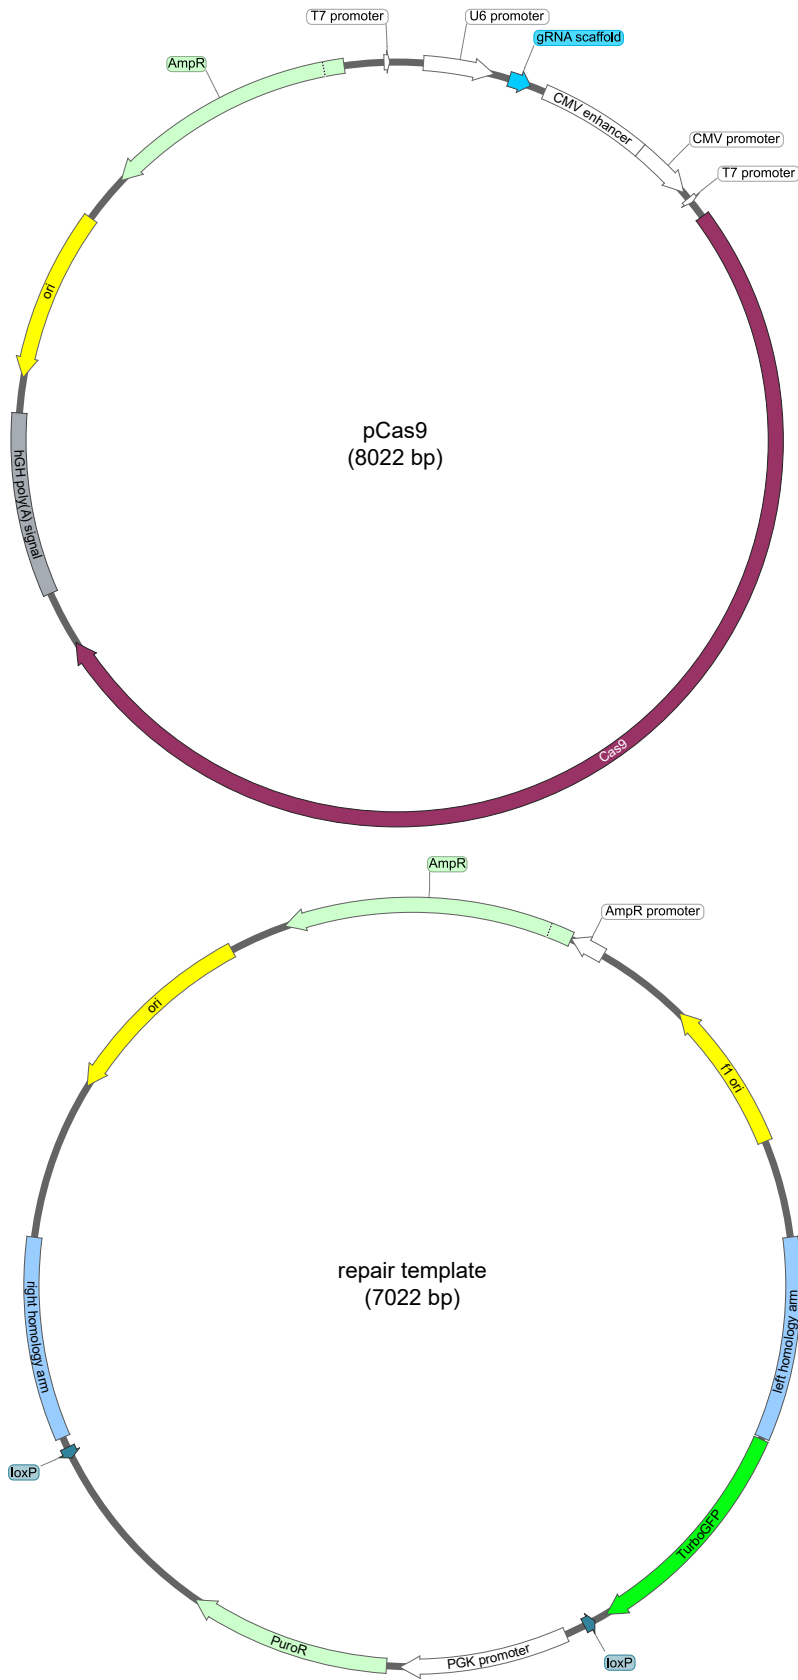

**Figure S4.** Maps of the pCas9 and repair template plasmids.

**Table S1. Primer used in PCR**

| <b>Primer</b> | <b>Orientation</b> | <b>Localization</b>                   | <b>Sequence (5' - 3')</b> |
|---------------|--------------------|---------------------------------------|---------------------------|
| # 1           | sense              | POLD1 NCS <sup>a</sup> , upstream LHA | GTGAGAGAGCACACACACGAC     |
| # 2           | antisense          | repair template, GFP                  | TAGGTGCCGAAGTGGTAGAAGC    |
| # 3           | sense              | repair template, spacer region        | TCTCTTGATTCCCACCTTTGTGGT  |
| # 4           | antisense          | POLD1 NCS, downstream RHA             | CAGATCAACGCTCCAAGCAC      |
| # 5           | sense              | POLD1, LHA                            | GAGGTGTCTCCGGTCAGAAC      |
| # 6           | antisense          | repair template, puromycin resistance | GAGGCCTTCCATCTGTTGCT      |
| # 7           | sense              | POLD1 NCS, upstream exon 13           | CCCAGACCCTGACGACTTGG      |
| # 8           | antisense          | POLD1 NCS, downstream exon 13         | TGGGAGTGGGGAGAAAAAGTG     |
| # 9           | sense              | POLD1 NCS, upstream exon 17           | TGCGTGAATTAGCACAAGGC      |
| # 10          | antisense          | POLD1 NCS, downstream exon 17         | GGACCAATTGCTCAAGCCAC      |
| # 11          | sense              | POLD1 NCS, upstream exon 18           | TCCGCATGATTCTCTCCCCG      |
| # 12          | antisense          | POLD1 NCS, downstream exon 18         | GTGGCTAATGCCAACGGGAC      |
| # 13          | sense              | POLD1, exon 2a                        | GGGCCTCTGGGATGATGATG      |
| # 14          | antisense          | POLD1, exon 21                        | CTGGGAGATATCGATGCGGT      |
| # 15          | sense              | POLD1, exon 10                        | GTATCATGGACCCCGACGTG      |
| # 16          | antisense          | POLD1, exon 14/15b                    | CGTAGTACCCTTTGAGGGGC      |
| # 17          | sense              | POLD1, exon 15b                       | CTGTGTTACACCACGCTCCT      |
| # 18          | antisense          | POLD1, exon 20                        | GTGAGGCAGTGACCAGGTTG      |

<sup>a</sup> NCS: non coding sequence

**Table S2. Primer used for sequencing**

| <b>Primer</b> | <b>Localization</b>                | <b>Sequence (5' - 3')</b> |
|---------------|------------------------------------|---------------------------|
| # S1          | upstream exon 2a, NCS <sup>a</sup> | TCAGAACCTCCACCAAG         |
| # S2          | upstream exon 13, NCS              | ACTTCCTTCTCCTGCTC         |
| # S3          | upstream exon 17, NCS              | TGTGCAGTGCACAGTAC         |
| # S4          | upstream exon 18, NCS              | GTTCGGACGTCAGATGATC       |
| # S5          | upstream exon 13                   | CTCCTACACGCTCAATG         |
| # S6          | upstream exon 17                   | AGATCCTGGAGAACCTG         |

<sup>a</sup> NCS: non coding sequence
